# Supplementary material for: Active learning of chemical reaction networksviaprobabilistic graphical models and Boolean reaction circuits
Source: Royal Society of Chemistry journal article supplement (doi:10.1039/d2re00315e), 2022-12-21
Supplement: d2re00315e1.zip [file d2re00315e1.zip]

## Sheet: Sheet1
Time	FA	LA	Dod	Tri	F
0	0.25	0.15	0	0	0
1	0	0	0.05	0.003	0.031
15	0	0	0.084	0.007	0.07
30	0	0	0.103	0.012	0.041
60	0	0	0.109	0.009	0.048
75	0	0	0.118	0.009	0.057
90	0	0	0.124	0.01	0.064
120	0	0	0.114	0.009	0.055

## Sheet: Sheet3
Time	FA	LA	Dod	Tri	F
0	0.25	0.15	0	0	0		Rxn 1	Rxn 2	Rxn 3	Rxn 4	Rxn 5
1	0	0	0.05	0.003	0.031		0.031	0.003	0.05	0.25	0.15
15	0	0	0.084	0.007	0.07		0.07	0.007	0.084	0.25	0.15
30	0	0	0.103	0.012	0.041		0.041	0.012	0.103	0.25	0.15
60	0	0	0.109	0.009	0.048		0.048	0.009	0.109	0.25	0.15
75	0	0	0.118	0.009	0.057		0.057	0.009	0.118	0.25	0.15
90	0	0	0.124	0.01	0.064		0.064	0.01	0.124	0.25	0.15
120	0	0	0.114	0.009	0.055		0.055	0.009	0.114	0.25	0.15

## Sheet: Sheet4
Time	FA	LA	Dod	Tri	F	Conv FA	Conv LA	Yield Dod	Yield Tri	Yield F
0	0.25	0.15	0	0	0
1	0	0	0.05	0.003	0.031	0.324	0.373333	0.333333	0.04	0.124
15	0	0	0.084	0.007	0.07	0.616	0.653333	0.56	0.0933333	0.28
30	0	0	0.103	0.012	0.041	0.576	0.846667	0.686667	0.16	0.164
60	0	0	0.109	0.009	0.048	0.628	0.846667	0.726667	0.12	0.192
75	0	0	0.118	0.009	0.057	0.7	0.906667	0.786667	0.12	0.228
90	0	0	0.124	0.01	0.064	0.752	0.96	0.826667	0.133333	0.256
120	0	0	0.114	0.009	0.055	0.676	0.88	0.76	0.12	0.22
					Conv LA	Yield Dod	Yield Tri	Yield F
					0.373333	0.333333	0.04	0.124
					0.653333	0.56	0.0933333	0.28
					0.846667	0.686667	0.16	0.164
					0.846667	0.726667	0.12	0.192
					0.906667	0.786667	0.12	0.228
					0.96	0.826667	0.133333	0.256
					0.88	0.76	0.12	0.22
					Conv FA	Yield Dod	Yield Tri	Yield F
					0.324	0.333333	0.04	0.124
					0.616	0.56	0.0933333	0.28
					0.576	0.686667	0.16	0.164
					0.628	0.726667	0.12	0.192
					0.7	0.786667	0.12	0.228
					0.752	0.826667	0.133333	0.256
					0.676	0.76	0.12	0.22

## Sheet: Sheet5
Time	FA	LA	Dod	Tri	F	FA_fin	LA_fin	CO2	H2O	Tot_C
0	0.25	0.15	0	0	0	0.25	0.15	0	0	0.4
1	0	0	0.05	0.003	0.031	0.169	0.094	0.084	0.034	0.381
15	0	0	0.084	0.007	0.07	0.096	0.052	0.161	0.077	0.386
30	0	0	0.103	0.012	0.041	0.106	0.023	0.156	0.053	0.338
60	0	0	0.109	0.009	0.048	0.093	0.023	0.166	0.057	0.339
75	0	0	0.118	0.009	0.057	0.075	0.014	0.184	0.066	0.339
90	0	0	0.124	0.01	0.064	0.062	0.006	0.198	0.074	0.34
120	0	0	0.114	0.009	0.055	0.081	0.018	0.178	0.064	0.341
